# Supplementary material for: Metabolism of α-PHP and α-PHPP in humans and the effects of alkyl chain lengths on the metabolism of α-pyrrolidinophenone-type designer drugs
Source: Springer Nature journal article supplement (doi:10.1007/s11419-018-0428-7), 2018-05-28
Supplement: MOESM1 [file 15797532]

## Supplementary material 1: chemical synthesis of analytical standards

$\alpha$ -PHP,  $\alpha$ -PHPP,  $\alpha$ -PHP-M1,  $\alpha$ -PHPP-M1,  $\alpha$ -PHP-M2, and  $\alpha$ -PHPP-M2 were synthesized in our laboratory based on our previously published methods [11–13], as follows:

### $\alpha$ -PHP

To a methylene chloride ( $\text{CH}_2\text{Cl}_2$ ) solution of hexanophenone (500 mg), one drop of bromine was added, and this was stirred for 5 min to initiate the reaction. An equivalent of bromine in  $\text{CH}_2\text{Cl}_2$  solution was added and stirred over 10 min. The solvent was then removed under vacuum to yield 2-bromo-hexanophenone.

To a solution of 2-bromo-hexanophenone (200 mg) in tetrahydrofuran (THF) was added dropwise pyrrolidine in THF, and the mixture was stirred at room temperature overnight. The reaction mixture was treated with 10 % HCl to make it acidic and was then washed with diethyl ether. The aqueous layer was then made basic with 10 %  $\text{Na}_2\text{CO}_3$  and extracted with ethyl acetate. The organic extract was washed with brine, dried over anhydrous  $\text{Na}_2\text{SO}_4$ , and evaporated to give crude  $\alpha$ -PHP as pale yellow oil. Finally, 10 % HCl MeOH solution was added dropwise to the oil. After removal of the solvent, the crude hydrochloride salt was purified by recrystallization from diethyl ether/2-propanol.

### 1-Phenyl-2-(pyrrolidin-1-yl)hexane-1-ol ( $\alpha$ -PHP-M1)

To a solution of  $\alpha$ -PHP (150 mg) in ethanol at 60 °C was added sodium tetrahydroborate, and the mixture was stirred at 60 °C for 1 h. The reaction mixture was evaporated under vacuum, and the residue was treated with 10 % HCl aqueous solution to make it acidic and was then washed with diethyl ether. The aqueous layer was then made basic with 10 %  $\text{Na}_2\text{CO}_3$  and extracted with ethyl acetate. The organic extract was washed with brine, dried over anhydrous  $\text{Na}_2\text{SO}_4$ , and evaporated to give diastereomic  $\alpha$ -PHP-M1 (referred to  $\alpha$ -PHP-M1-D1 and  $\alpha$ -PHP-M1-D2 as defined below) as pale yellow oil. The product ratio of the diastereomers was determined by NMR spectroscopy.

## Proton NMR

Proton NMR data is presented in the following order: (multiplicity, integration, coupling constants in Hz, assignment).

$^1\text{H}$  NMR (400 MHz,  $\text{CDCl}_3$ ; compound exists as a mixture of diastereomers,  $\alpha$ -PHP-M1-D1 is denoted by  $\S$ ,  $\alpha$ -PHP-M1-D2 denoted by \*):  $\delta$  7.38–7.29 (m,  $4\text{H}^\S$  and  $4\text{H}^*$ , ArH), 7.29–7.20 (m,  $1\text{H}^\S$  and  $1\text{H}^*$ , ArH), 5.00 (d,  $J = 3.6$  Hz,  $1\text{H}^*$ ,  $-\text{CH}(\text{OH})-$ ), 4.18 (d,  $J = 9.2$  Hz,  $1\text{H}^\S$ ,  $-\text{CH}(\text{OH})-$ ), 2.83–2.63 (m,  $5\text{H}^\S$  and  $4\text{H}^*$ ,  $-\text{CH}_2\text{-N-CH}_2-$  and  $-\text{CH}(\text{OH})\text{CH}_2^\S$ ), 2.54 (dd,  $J = 8.8, 3.6$  Hz,  $1\text{H}^*$ ,  $-\text{CH}(\text{OH})\text{CH}_2-$ ), 1.85–1.75 (m,  $4\text{H}^*$  and  $4\text{H}^\S$ ,  $-\text{NCH}_2\text{CH}_2\text{CH}_2-$ ), 1.54–1.36 (m,  $1\text{H}^*$  and  $1\text{H}^\S$ ,  $-\text{C}(\text{OH})\text{CHCH}_2-$ ), 1.33–0.92 (m,  $5\text{H}^*$  and  $5\text{H}^\S$ ,  $-\text{C}(\text{OH})\text{CHCH}_2-$  and  $-(\text{CH}_2)_2\text{CH}_3$ ), 0.74 (t,  $J = 7.2$  Hz,  $3\text{H}^*$ ,  $-\text{CH}_2\text{CH}_3$ ), 0.70 (t,  $J = 7.2$  Hz,  $3\text{H}^\S$ ,  $-\text{CH}_2\text{CH}_3$ ). The ratios of diastereomers is 1.0 (D1/D2).

High-resolution mass spectrometry (HRMS): calculated for  $[\text{M}+\text{H}]^+$  248.2009, found 248.2007.

## $\alpha$ -(2''-Oxo-pyrrolidino)hexanophenone ( $\alpha$ -PHP-M2)

To a solution of 2-bromo-hexanophenone (200 mg) in THF at 0 °C was added, dropwise, suspension of 2-pyrrolidinone and NaH (60 %, dispersion in paraffin, Tokyo Chemical Industry, Tokyo, Japan) in THF. The mixture was stirred at 0 °C for 1 h. The reaction mixture was added water and extracted with ethyl acetate. The organic extract was washed with brine, dried over anhydrous  $\text{Na}_2\text{SO}_4$ , and evaporated under vacuum. The resultant residue was subjected to column chromatography using a silica gel column and an ethyl acetate/*n*-hexane mixture (2:3, v/v) as an eluent to isolate  $\alpha$ -PHP-M2. Finally, the solution was concentrated under vacuum to give  $\alpha$ -PHP-M2 as pale yellow oil.

## Proton NMR

$^1\text{H}$  NMR (400 MHz,  $\text{CD}_3\text{OD}$ ):  $\delta$  8.07–8.02 (m, 2H, ArH), 7.60–7.55 (m, 1H, ArH), 7.49–7.44 (m, 2H, ArH), 5.64 (dd,  $J = 9.4, 5.8$  Hz, 1H,  $-\text{COCHCH}_2-$ ), 3.36 (ddd,  $J = 9.6, 8.4, 6.4$  Hz, 1H,  $-\text{CH}_2\text{NCO-}$ ), 3.26 (ddd,  $J = 9.6, 8.4, 5.6$  Hz, 1H,  $-\text{CH}_2\text{NCO-}$ ), 2.43 (ddd,  $J = 17, 9.6, 7.2$  Hz, 1H,  $-\text{NCOCH}_2-$ ), 2.33 (ddd,  $J = 17, 9.2, 6.4$  Hz, 1H,  $-\text{NCOCH}_2-$ ), 2.04–1.84 (m, 3H,  $-\text{NCOCH}_2\text{CH}_2-$  and  $-\text{COCHCH}_2-$ ), 1.80–1.69 (m, 1H,  $-\text{COCHCH}_2-$ ), 1.49–1.15 (m, 4H,  $-\text{CH}_2\text{CH}_2\text{CH}_3$ ), 0.90 (t,  $J = 7.2$  Hz, 3H,  $-\text{CH}_2\text{CH}_3$ ). HRMS: calculated for  $[\text{M}+\text{H}]^+$  260.1645, found 260.1649.

### **$\alpha$ -PHPP and $\alpha$ -(2''-oxo-pyrrolidino)heptanophenone ( $\alpha$ -PHPP-M2)**

$\alpha$ -PHPP and  $\alpha$ -PHPP-M2 were synthesized via  $\alpha$ -PHP 2-bromo-heptanophenone, according to the method described above for  $\alpha$ -PHP and  $\alpha$ -PHP-M2, respectively.

#### **Proton NMR of $\alpha$ -PHPP-M2**

$^1\text{H}$  NMR (400 MHz,  $\text{CD}_3\text{OD}$ ):  $\delta$  8.07–8.02 (m, 2H, ArH), 7.60–7.54 (m, 1H, ArH), 7.50–7.44 (m, 2H, ArH), 5.64 (dd,  $J = 9.2, 5.6$  Hz, 1H,  $-\text{COCH}_2\text{CH}_2-$ ), 3.36 (ddd,  $J = 9.6, 8.4, 6.0$  Hz, 1H,  $-\text{CH}_2\text{NCO}-$ ), 3.26 (ddd,  $J = 9.6, 8.4, 5.4$  Hz, 1H,  $-\text{CH}_2\text{NCO}-$ ), 2.43 (ddd,  $J = 17, 9.4, 7.2$  Hz, 1H,  $-\text{NCOCH}_2-$ ), 2.33 (ddd,  $J = 17, 9.4, 6.4$  Hz, 1H,  $-\text{NCOCH}_2-$ ), 2.04–1.84 (m, 3H  $-\text{NCOCH}_2\text{CH}_2-$  and  $-\text{COCHCH}_2-$ ), 1.79–1.68 (m, 1H,  $-\text{COCHCH}_2-$ ), 1.41–1.21 (m, 6H,  $-\text{CH}_2\text{CH}_2\text{CH}_2\text{CH}_3$ ), 0.88 (t,  $J = 6.6$  Hz, 3H,  $-\text{CH}_2\text{CH}_3$ ). HRMS: calculated for  $[\text{M}+\text{H}]^+$  274.1802, found 274.1801.

### **1-Phenyl-2-(pyrrolidin-1-yl)heptan-1-ol ( $\alpha$ -PHPP-M1)**

$\alpha$ -PHPP-M1 was synthesized from  $\alpha$ -PHPP according to the above mentioned method for  $\alpha$ -PHP-M1.

#### **Proton NMR**

$^1\text{H}$  NMR (400 MHz,  $\text{CDCl}_3$ ; compound exists as a mixture of diastereomers,  $\alpha$ -PHPP-M1-D1 is denoted by  $\S$ ,  $\alpha$ -PHPP-M1-D2 denoted by \*):  $\delta$  7.39–7.29 (m, 4H $^\S$  and 4H\*, ArH), 7.28–7.20 (m, 1H $^\S$  and 1H\*, ArH), 5.00 (d,  $J = 4.0$  Hz, 1H\*,  $-\text{CH}(\text{OH})-$ ), 4.18 (d,  $J = 9.2$  Hz, 1H $^\S$ ,  $-\text{CH}(\text{OH})-$ ), 2.82–2.62 (m, 5H $^\S$  and 4H\*,  $-\text{CH}_2\text{-N-CH}_2-$  and  $-\text{CH}(\text{OH})\text{CH}_2-$ ), 2.54 (dd,  $J = 8.8, 4.0$  Hz, 1H\*,  $-\text{CH}(\text{OH})\text{CH}_2-$ ), 1.88–1.75 (m, 4H\* and 4H $^\S$ ,  $-\text{NCH}_2\text{CH}_2\text{CH}_2-$ ), 1.53–1.36 (m, 1H $^\S$  and 1H\*,  $-\text{C}(\text{OH})\text{CHCH}_2-$ ), 1.35–0.90 (m, 7H $^\S$  and 7H\*,  $-\text{C}(\text{OH})\text{CHCH}_2-$  and  $-(\text{CH}_2)_2\text{CH}_3$ ), 0.77 (t,  $J = 7.2$  Hz, 3H\*,  $-\text{CH}_2\text{CH}_3$ ), 0.74 (t,  $J = 7.2$  Hz, 3H $^\S$ ,  $-\text{CH}_2\text{CH}_3$ ). The ratios of diastereomers is 1.2 (D1/D2). HRMS: calculated for  $[\text{M}+\text{H}]^+$  262.2165, found 262.2163.
