# Supplementary material for: Metabolism of α-PHP and α-PHPP in humans and the effects of alkyl chain lengths on the metabolism of α-pyrrolidinophenone-type designer drugs
Source: Springer Nature journal article supplement (doi:10.1007/s11419-018-0428-7), 2018-05-28
Supplement: MOESM2 [file 15797532]

## Supplementary material 2:

**Table S1** Validation data for the LC–MS/MS procedure established in the present study

| Validation item                     | $\alpha$ -PHP          | $\alpha$ -PHP-M1-D1    | $\alpha$ -PHP-M1-D2    | $\alpha$ -PHP-M2       | $\alpha$ -PHPP         | $\alpha$ -PHPP-M1-D1   | $\alpha$ -PHPP-M1-D2   | $\alpha$ -PHPP-M2      |
|-------------------------------------|------------------------|------------------------|------------------------|------------------------|------------------------|------------------------|------------------------|------------------------|
| Recovery (%) <sup>a</sup>           |                        |                        |                        |                        |                        |                        |                        |                        |
| 5 ng/mL                             | 87.1                   | 98.6                   | 97.1                   | 111                    | 93.7                   | 112                    | 113                    | 117                    |
| 40 ng/mL                            | 91.7                   | 97.1                   | 98.3                   | 104                    | 89.8                   | 105                    | 102                    | 121                    |
| 200 ng/mL                           | 95.1                   | 101                    | 103                    | 109                    | 92.2                   | 103                    | 103                    | 119                    |
| Linearity <sup>b</sup>              |                        |                        |                        |                        |                        |                        |                        |                        |
| Range (ng/mL)                       | 3.0–300                | 3.0–300                | 3.0–300                | 3.0–300                | 3.0–300                | 3.0–300                | 3.0–300                | 3.0–300                |
| Equation                            | $y = 0.162x - 0.00063$ | $y = 0.598x + 0.00202$ | $y = 0.098x - 0.00014$ | $y = 0.298x - 0.00243$ | $y = 0.196x - 0.00103$ | $y = 0.519x - 0.00269$ | $y = 0.094x + 0.00018$ | $y = 0.186x - 0.00306$ |
| $R^2$                               | 0.9988                 | 0.9986                 | 0.9984                 | 0.9967                 | 0.9981                 | 0.9984                 | 0.9941                 | 0.9930                 |
| LOD (ng/mL)                         | 0.45                   | 0.15                   | 0.75                   | 0.24                   | 0.30                   | 0.15                   | 0.90                   | 0.45                   |
| LLOQ (ng/mL)                        | 1.5                    | 0.50                   | 2.5                    | 0.80                   | 1.0                    | 0.50                   | 3.0                    | 1.5                    |
| Intraday accuracy (%) <sup>c</sup>  |                        |                        |                        |                        |                        |                        |                        |                        |
| 5 ng/mL                             | +4.51                  | -4.81                  | -2.38                  | -4.01                  | -7.88                  | -2.56                  | +0.44                  | -6.14                  |
| 40 ng/mL                            | -3.71                  | +1.72                  | +3.30                  | -6.86                  | -6.19                  | -7.09                  | +0.41                  | -14.15                 |
| 200 ng/mL                           | -3.95                  | -0.60                  | +6.55                  | -3.10                  | -7.74                  | -3.07                  | +4.11                  | -5.56                  |
| Intraday precision (%) <sup>c</sup> |                        |                        |                        |                        |                        |                        |                        |                        |
| 5 ng/mL                             | 11.94                  | 4.33                   | 7.15                   | 6.27                   | 5.23                   | 5.81                   | 8.13                   | 6.00                   |
| 40 ng/mL                            | 7.45                   | 3.39                   | 11.01                  | 5.07                   | 8.49                   | 4.60                   | 10.44                  | 2.91                   |
| 200 ng/mL                           | 7.09                   | 4.13                   | 7.35                   | 4.00                   | 4.55                   | 3.34                   | 6.26                   | 9.36                   |
| Interday accuracy (%) <sup>d</sup>  |                        |                        |                        |                        |                        |                        |                        |                        |
| 5 ng/mL                             | +2.84                  | -3.95                  | +2.54                  | +1.59                  | -2.91                  | +2.98                  | +3.28                  | -2.52                  |
| 40 ng/mL                            | -1.29                  | +3.80                  | +5.28                  | -3.81                  | -5.68                  | +3.35                  | +2.04                  | -8.90                  |
| 200 ng/mL                           | -1.33                  | +3.56                  | +5.03                  | +1.97                  | -5.60                  | +2.63                  | +8.32                  | +4.97                  |
| Interday precision (%) <sup>d</sup> |                        |                        |                        |                        |                        |                        |                        |                        |
| 5 ng/mL                             | 7.69                   | 7.71                   | 11.43                  | 7.52                   | 8.83                   | 8.79                   | 11.06                  | 9.50                   |
| 40 ng/mL                            | 9.82                   | 8.26                   | 9.42                   | 9.07                   | 6.63                   | 9.40                   | 9.77                   | 14.37                  |
| 200 ng/mL                           | 7.65                   | 7.39                   | 7.22                   | 8.67                   | 5.83                   | 5.36                   | 6.87                   | 14.10                  |

$R^2$  coefficient of determination, *LOD* limit of detection, *LLOQ* lower limit of quantification ( $10\sigma$ )

<sup>a</sup> The recoveries were calculated by comparing peak areas of the analytes extracted from spiked samples with those spiked in urinary extract ( $n = 5$ )

<sup>b</sup> Five different concentrations (3 replicates per level)

<sup>c</sup>  $n = 5$

<sup>d</sup>  $n = 15$  (3 days,  $n = 5$ )
